# Supplementary material for: Identification and Quantification of Bioactive Molecules Inhibiting Pro-inflammatory Cytokine Production in Spent Coffee Grounds Using Metabolomics Analyses
Source: Front Pharmacol. 2020 Mar 6;11:229. doi: 10.3389/fphar.2020.00229 (PMC7073796; doi:10.3389/fphar.2020.00229)
Supplement: Supplementary file 1 [file Table_1.docx]

**Supplementary Information**

**Identification and Quantification of Bioactive Molecules Inhibiting Pro-inflammatory Cytokine Production in Spent Coffee Grounds Using Metabolomics Analyses**

Khanh-Van Ho1,2, Kathy L. Schreiber3, Jihyun Park1, Phuc Vo1, Zhentian Lei4,5, Lloyd W. Sumner4,5, Charles R. Brown6, and Chung-Ho Lin1*

1Center for Agroforestry, School of Natural Resources, University of Missouri, Columbia, Missouri, USA

2Department of Food Technology, Can Tho University, Can Tho, Vietnam

3Cell and Immunobiology Core, University of Missouri, Columbia, Missouri, USA

4Metabolomics Center, University of Missouri, Columbia, Missouri, USA

5Department of Biochemistry, Bond Life Sciences Center, University of Missouri, Columbia, Missouri, USA

6Department of Veterinary Pathobiology, University of Missouri, Columbia, Missouri, USA

***Correspondence:**Corresponding Author:
Chung-Ho Lin: LinChu@missouri.edu

**Supplementary Table 1**. Putative metabolites with known to produce anti-inflammatory activities in the methanolic extracts of spent coffee grounds identified via an untargeted metabolomics approach

| **No.** | **Putatively identified compound** | **Anti-inflammatory activity** |
| --- | --- | --- |
| 1 | 3-Caffeoylquinic acid | Hwang et al. (2014) |
| 2 | 5-Caffeoylquinic acid | Kim et al. (2015) |
| 3 | 3,5-Caffeoylquinic acid | Hong et al. (2015) |
| 4 | Caffeic acid | Chao et al. (2009) |
| 5 | Caffeine | Köroğlu et al. (2014) |
| 6 | Catechin | Nakanishi et al. (2010) |
| 7 | Chrysin | Ahad et al. (2014) |
| 8 | Daidzein | Liu et al. (2009) |
| 9 | Epicatechin | Morrison et al. (2014) |
| 10 | Eugenol | Yogalakshmi et al. (2010) |
| 11 | Ferulic acid | Zhu et al. (2014) |
| 12 | Gallic acid | Kim et al. (2005) |
| 13 | Naringenin | Pinho-Ribeiro et al. (2016) |
| 14 | Naringin | Sahu et al. (2014) |
| 15 | Oxyresveratrol | Wei et al. (2017) |
| 16 | p-Coumaric acid | Pragasam et al. (2013) |
| 17 | p-Hydroxybenzoic acid | Manuja et al. (2013) |
| 18 | Pectolinarin | Lim et al. (2008) |
| 19 | Quercetin | Guardia et al. (2001) |
| 20 | Quinic acid | Åkesson et al. (2005) |
| 21 | Resveratrol | Nunes et al. (2018) |
| 22 | Rutin | Guardia et al. (2001) |
| 23 | Tectochrysin | Hou et al. (2018) |
| 24 | Theaflavin | Zu et al. (2012) |
| 25 | Vanillic acid | Kim et al. (2011) |
| 26 | Vitexin rhamnoside | Tadić et al. (2008) |

**References**

Ahad, A., A. A. Ganai, M. Mujeeb, and W. A. Siddiqui. 2014. Chrysin, an anti-inflammatory molecule, abrogates renal dysfunction in type 2 diabetic rats. Toxicol. Appl. Pharmacol 279: 1-7.

Åkesson, C., H. Lindgren, R. W. Pero, T. Leanderson, and F. Ivars. 2005. Quinic acid is a biologically active component of the Uncaria tomentosa extract C-Med 100®. Int. Immunopharmacol. 5: 219-229.

Chao, P.-c., C.-c. Hsu, and M.-c. Yin. 2009. Anti-inflammatory and anti-coagulatory activities of caffeic acid and ellagic acid in cardiac tissue of diabetic mice. Nutr. Metab. 6: 33.

Guardia, T., A. E. Rotelli, A. O. Juarez, and L. E. Pelzer. 2001. Anti-inflammatory properties of plant flavonoids. Effects of rutin, quercetin and hesperidin on adjuvant arthritis in rat. Il farmaco 56: 683-687.

Hong, S., T. Joo, and J.-W. Jhoo. 2015. Antioxidant and anti-inflammatory activities of 3, 5-dicaffeoylquinic acid isolated from *Ligularia fischeri* leaves. Food Sci. Biotechnol. 24: 257-263.

Hou, R., Y. Han, Q. Fei, Y. Gao, R. Qi, R. Cai, and Y. Qi. 2018. Dietary Flavone Tectochrysin exerts anti‐inflammatory action by directly inhibiting MEK1/2 in LPS‐primed macrophages. Mol. Nutr. Food Res. 62: 1700288.

Hwang, S. J., Y.-W. Kim, Y. Park, H.-J. Lee, and K.-W. Kim. 2014. Anti-inflammatory effects of chlorogenic acid in lipopolysaccharide-stimulated RAW 264.7 cells. Inflamm. Res. 63: 81-90.

Kim, M.-C., S.-J. Kim, D.-S. Kim, Y.-D. Jeon, S. J. Park, H. S. Lee, J.-Y. Um, and S.-H. Hong. 2011. Vanillic acid inhibits inflammatory mediators by suppressing NF-κB in lipopolysaccharide-stimulated mouse peritoneal macrophages. ‎Immunopharmacol. Immunotoxicol. 33: 525-532.

Kim, M., S.-Y. Choi, P. Lee, and J. Hur. 2015. Neochlorogenic acid inhibits lipopolysaccharide-induced activation and pro-inflammatory responses in BV2 microglial cells. Neurochem. Res. 40: 1792-1798.

Kim, S.-H., C.-D. Jun, K. Suk, B.-J. Choi, H. Lim, S. Park, S. H. Lee, H.-Y. Shin, D.-K. Kim, and T.-Y. Shin. 2005. Gallic acid inhibits histamine release and pro-inflammatory cytokine production in mast cells. Toxicol. Sci. 91: 123-131.

Köroğlu, Ö. A., P. M. MacFarlane, K. V. Balan, W. J. Zenebe, A. Jafri, R. J. Martin, and P. Kc. 2014. Anti-inflammatory effect of caffeine is associated with improved lung function after lipopolysaccharide-induced amnionitis. Neonatology 106: 235-240.

Lim, H., K. H. Son, H. W. Chang, K. Bae, S. S. Kang, and H. P. Kim. 2008. Anti-inflammatory activity of pectolinarigenin and pectolinarin isolated from *Cirsium chanroenicum*. Biol. Pharm. Bull. 31: 2063-2067.

Liu, M.-H., Y.-S. Lin, S.-Y. Sheu, and J.-S. Sun. 2009. Anti-inflammatory effects of daidzein on primary astroglial cell culture. Nutr. Neurosci. 12: 123-134.

Manuja, R., S. Sachdeva, A. Jain, and J. Chaudhary. 2013. A comprehensive review on biological activities of p-hydroxy benzoic acid and its derivatives. Int. J. Pharm. Sci. Rev. Res 22: 109-115.

Morrison, M., R. van der Heijden, P. Heeringa, E. Kaijzel, L. Verschuren, R. Blomhoff, T. Kooistra, and R. Kleemann. 2014. Epicatechin attenuates atherosclerosis and exerts anti-inflammatory effects on diet-induced human-CRP and NFκB in vivo. Atherosclerosis 233: 149-156.

Nakanishi, T., K. Mukai, H. Yumoto, K. Hirao, Y. Hosokawa, and T. Matsuo. 2010. Anti‐inflammatory effect of catechin on cultured human dental pulp cells affected by bacteria‐derived factors. Eur. J. Oral Sci. 118: 145-150.

Nunes, S., F. Danesi, D. Del Rio, and P. Silva. 2018. Resveratrol and inflammatory bowel disease: The evidence so far. Nutr. Res. Rev. 31: 85-97.

Pinho-Ribeiro, F. A., A. C. Zarpelon, V. Fattori, M. F. Manchope, S. S. Mizokami, R. Casagrande, and W. A. Verri Jr. 2016. Naringenin reduces inflammatory pain in mice. Neuropharmacology 105: 508-519.

Pragasam, S. J., V. Venkatesan, and M. Rasool. 2013. Immunomodulatory and anti-inflammatory effect of p-coumaric acid, a common dietary polyphenol on experimental inflammation in rats. Inflammation 36: 169-176.

Sahu, B. D., S. Tatireddy, M. Koneru, R. M. Borkar, J. M. Kumar, M. Kuncha, R. Srinivas, and R. Sistla. 2014. Naringin ameliorates gentamicin-induced nephrotoxicity and associated mitochondrial dysfunction, apoptosis and inflammation in rats: possible mechanism of nephroprotection. Toxicol. Appl. Pharmacol. 277: 8-20.

Tadić, V. M., S. Dobrić, G. M. Marković, S. M. Ðorđević, I. A. Arsić, N. a. R. Menković, and T. Stević. 2008. Anti-inflammatory, gastroprotective, free-radical-scavenging, and antimicrobial activities of hawthorn berries ethanol extract. J. Agric. Food Chem. 56: 7700-7709.

Wei, J., J.-R. Chen, E. M. A. Pais, T.-Y. Wang, L. Miao, L. Li, L.-Y. Li, F. Qiu, L.-M. Hu, and X.-M. Gao. 2017. Oxyresveratrol is a phytoestrogen exerting anti-inflammatory effects through NF-κB and estrogen receptor signaling. Inflammation 40: 1285-1296.

Yogalakshmi, B., P. Viswanathan, and C. V. Anuradha. 2010. Investigation of antioxidant, anti-inflammatory and DNA-protective properties of eugenol in thioacetamide-induced liver injury in rats. Toxicology 268: 204-212.

Zhu, H., Q.-H. Liang, X.-G. Xiong, J. Chen, D. Wu, Y. Wang, B. Yang, Y. Zhang, Y. Zhang, and X. Huang. 2014. Anti-inflammatory effects of the bioactive compound ferulic acid contained in oldenlandia diffusa on collagen-induced arthritis in rats. Evid.-Based Complementary Altern. Med. 2014.

Zu, M., F. Yang, W. Zhou, A. Liu, G. Du, and L. Zheng. 2012. In vitro anti-influenza virus and anti-inflammatory activities of theaflavin derivatives. Antivir. Res. 94: 217-224.
